# Supplementary material for: Glycomics meets lipidomics—associations of N -glycans with classical lipids, glycerophospholipids, and sphingolipids in three European populations
Source: Royal Society of Chemistry journal article supplement (doi:10.1039/c0mb00095g), 2011-03-28
Supplement: c0mb00095g.pdf [file c0mb00095g.pdf]

**Glycomics meets lipidomics –  
Associations of N-glycans with classical lipids, glycerophospholipids, and  
sphingolipids in three European populations**  
[Online Supporting Information]

Wilmar Igl, Ozren Polašek, Olga Gornik, Ana Knežević, Maja Pučić, Mislav Novokmet, Jennifer Huffman, Caroline Hayward, Veronique Vitart, Alan F. Wright, Nicholas D. Hastie, Carsten Gnewuch, Gerhard Liebisch, Ivana Kolčić, Lina Zgaga, Pauline M. Rudd, Harry Campbell, James F. Wilson, Igor Rudan, Ulf Gyllenstein, Gerd Schmitz and Gordan Lauc

**Figure S1.** Associations between N-glycan traits and classical lipids (TC, LDL-C, HDL-C, TG) in VIS (Croatia), NSPHS (Sweden), and ORCADES (Scotland). A) Heatmap of Pearson correlation coefficients. B) Colorkey and histogram of the Pearson correlation coefficients  $r$ .

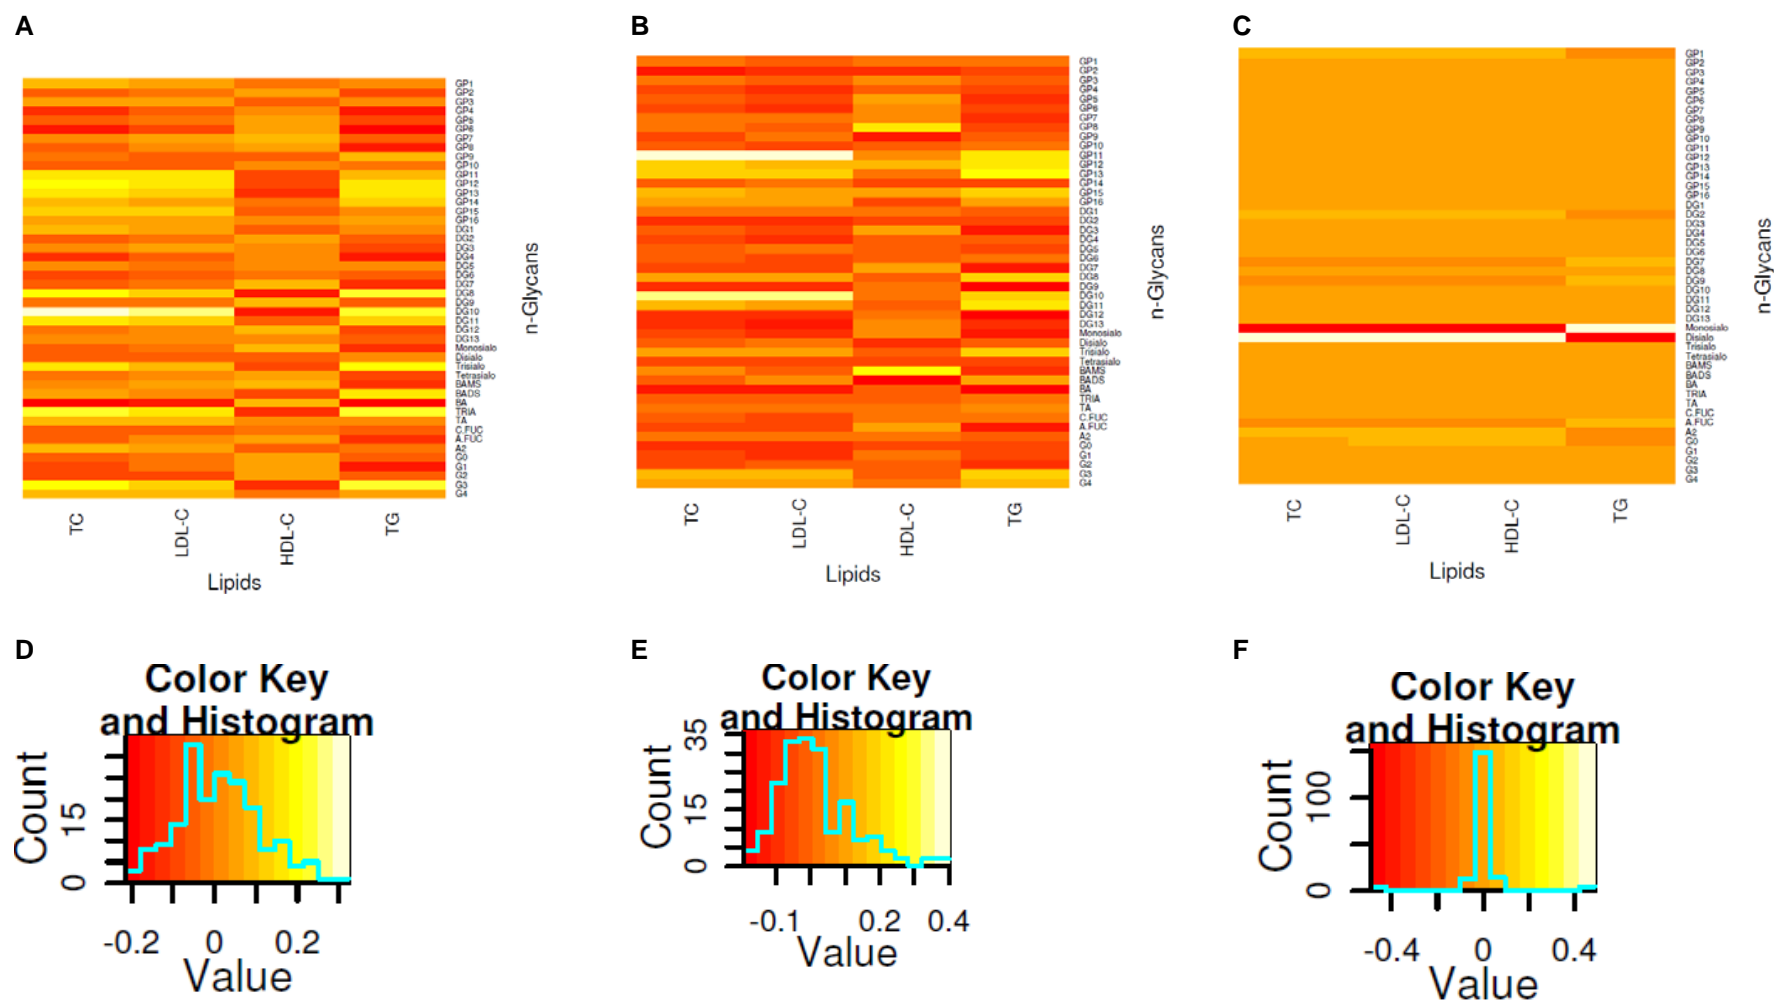

**Figure S2.** Associations between glycan species and glycerophospholipids in the VIS cohort (Croatia). A) Heatmap of Pearson correlation coefficients. B) Colorkey and histogram of the Pearson correlation coefficients  $r$ .

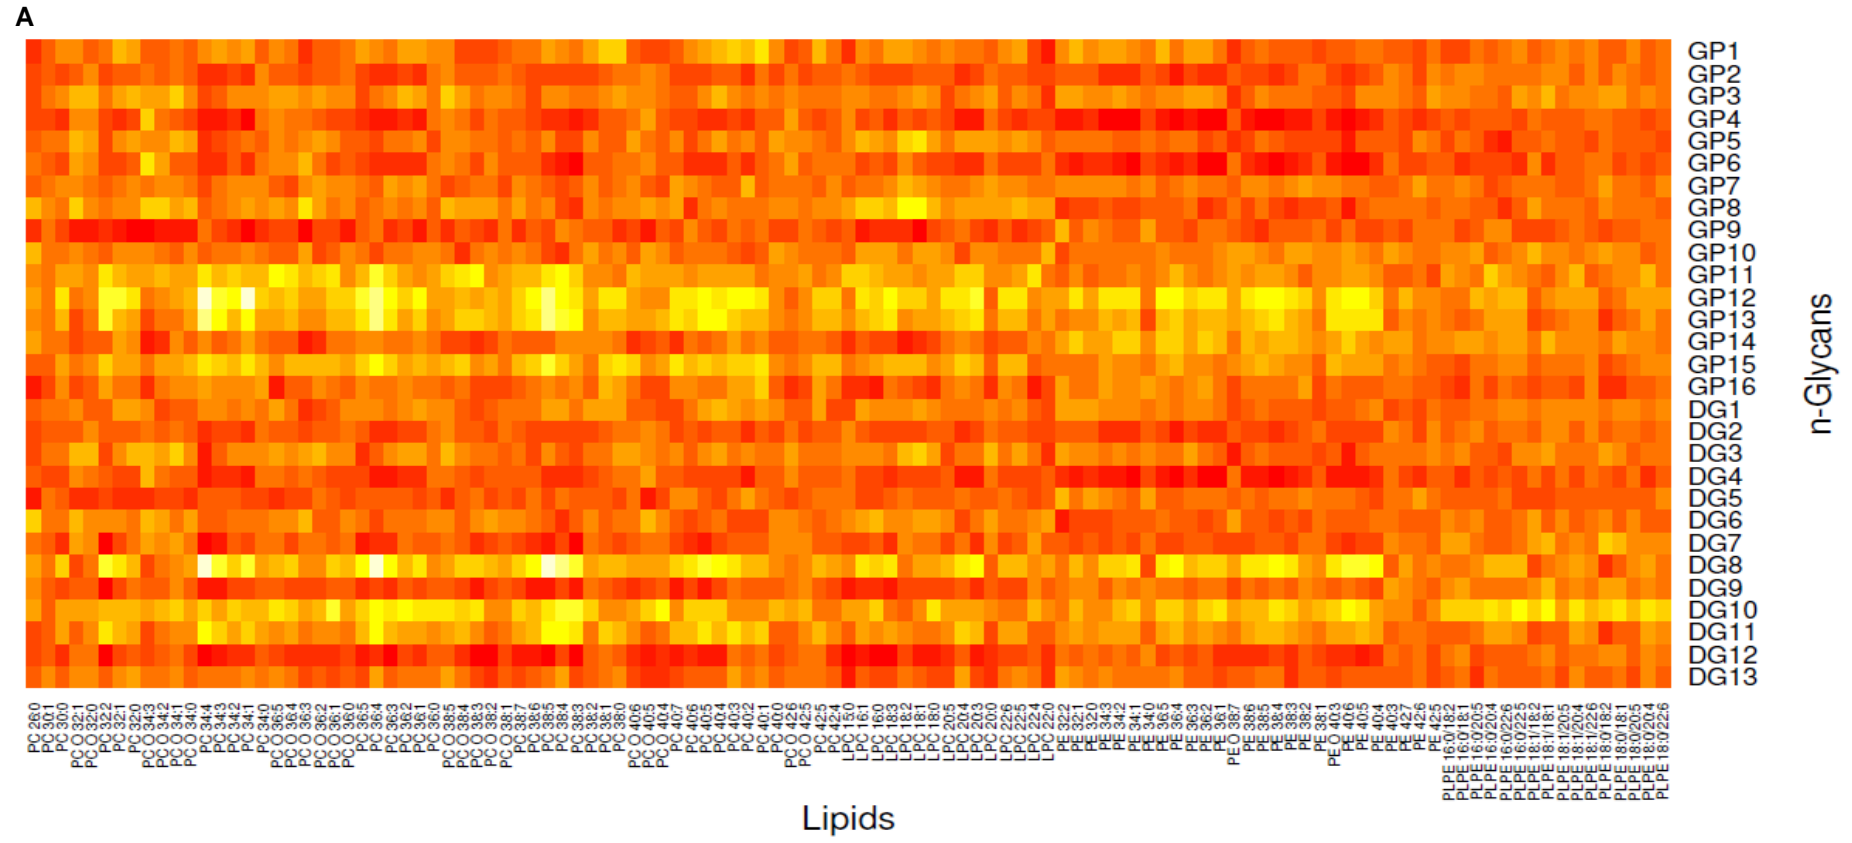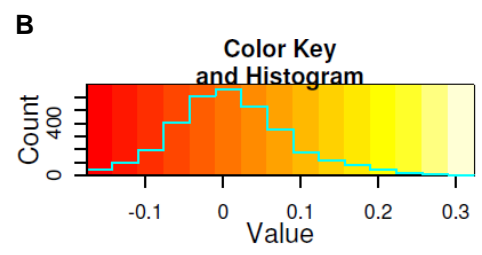

**Figure S3.** Associations between glycan species and sphingolipids species in the VIS cohort (Croatia). A) Heatmap of Pearson correlation coefficients. B) Colorkey and histogram of the Pearson correlation coefficients  $r$ .

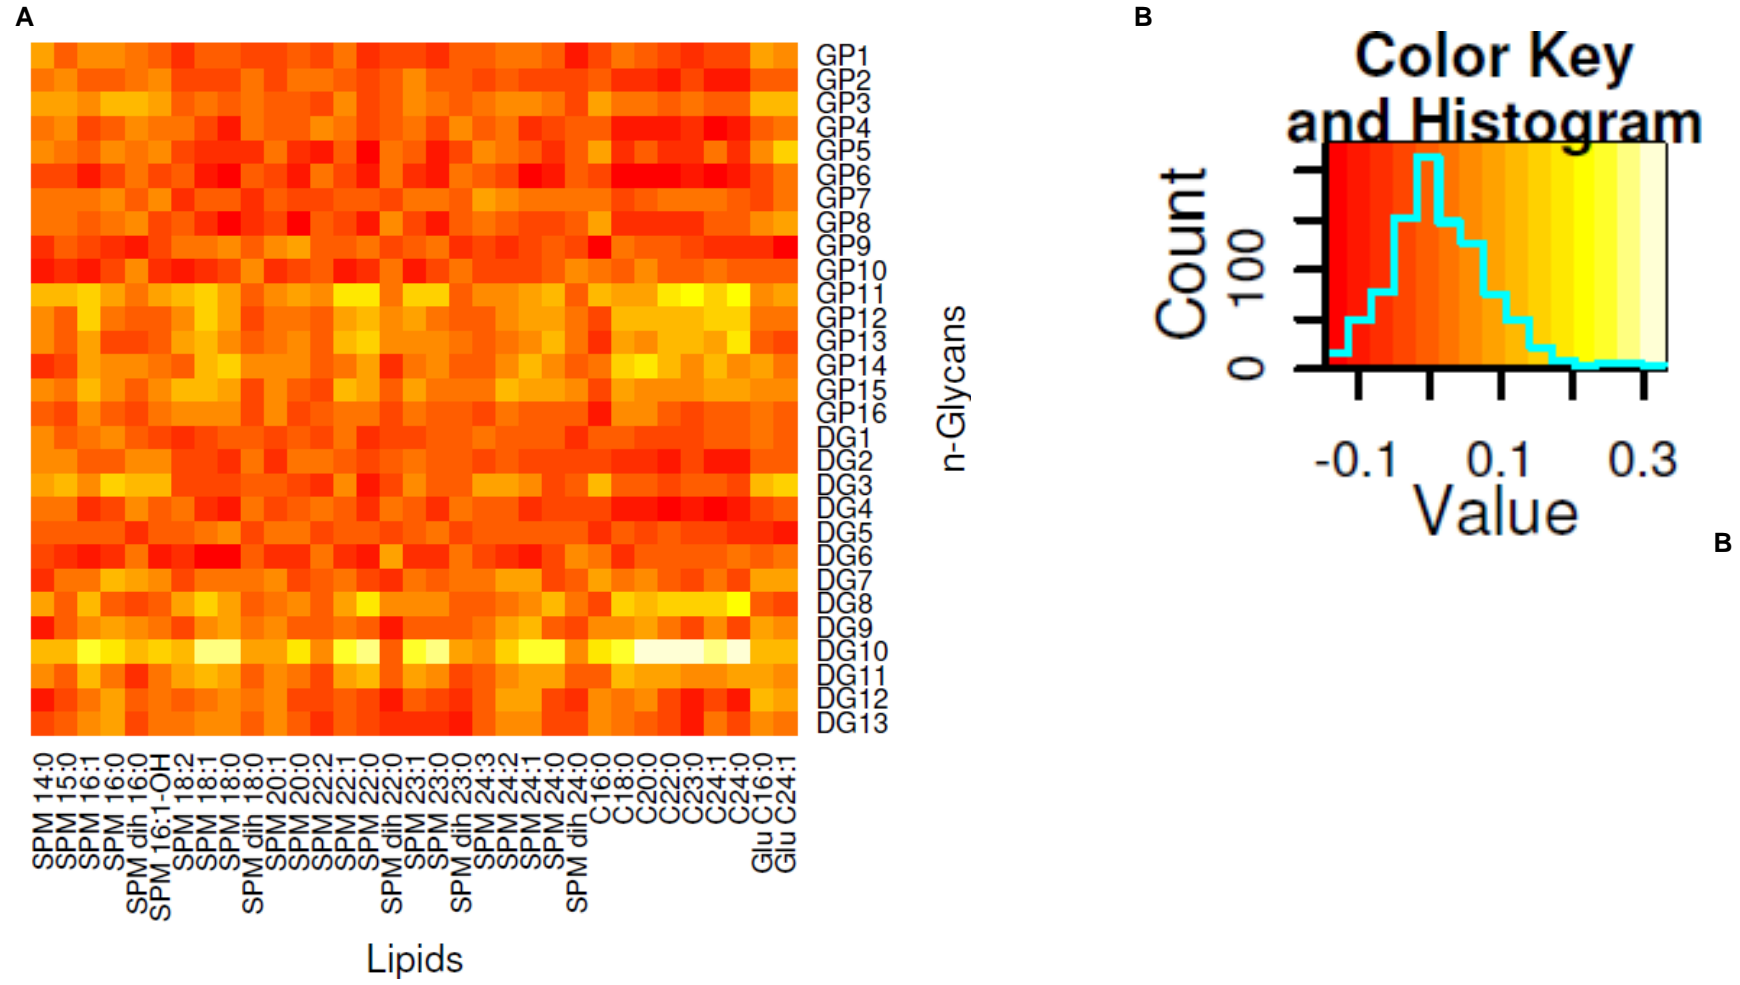

**Figure S4.** Associations between glycan summary scores and lipid summary scores in the VIS cohort (Croatia). A) Heatmap of Pearson correlation coefficients. B) Colorkey and histogram of the Pearson correlation coefficients  $r$ .

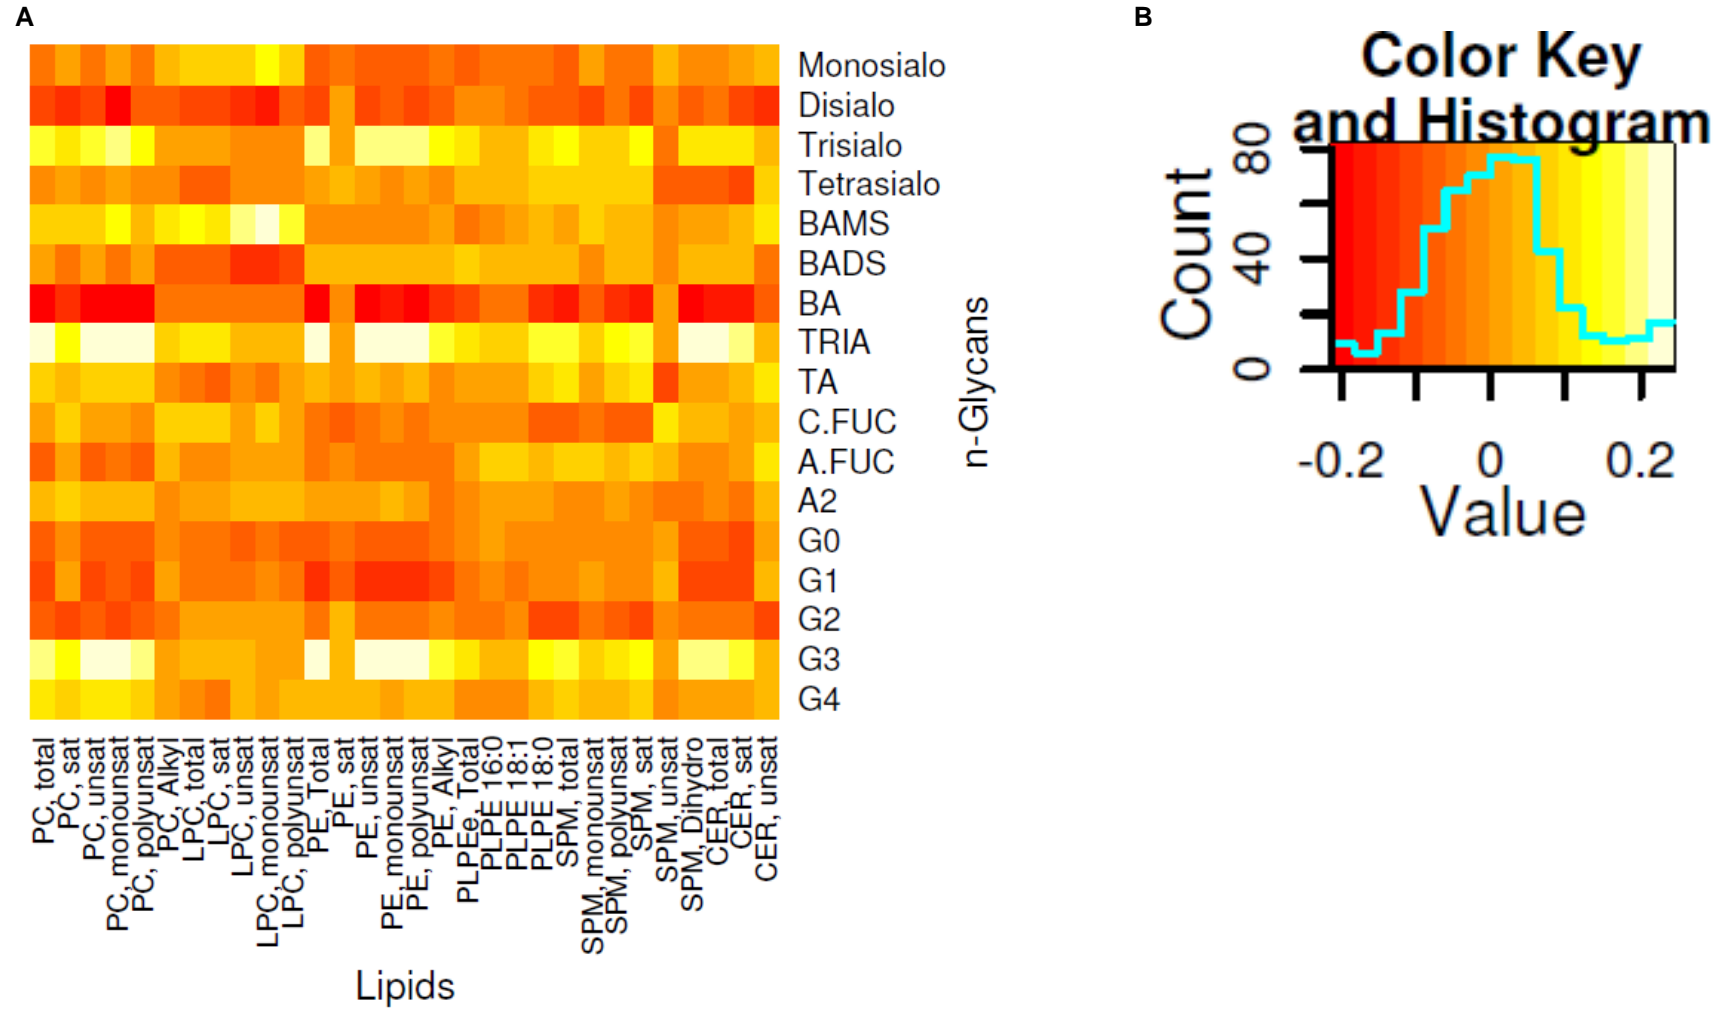



**Figure S6.** Associations between glycan species and sphingolipids species in the ORCADES cohort (Scotland). A) Heatmap of Pearson correlation coefficients. B) Colorkey and histogram of the Pearson correlation coefficients  $r$ .

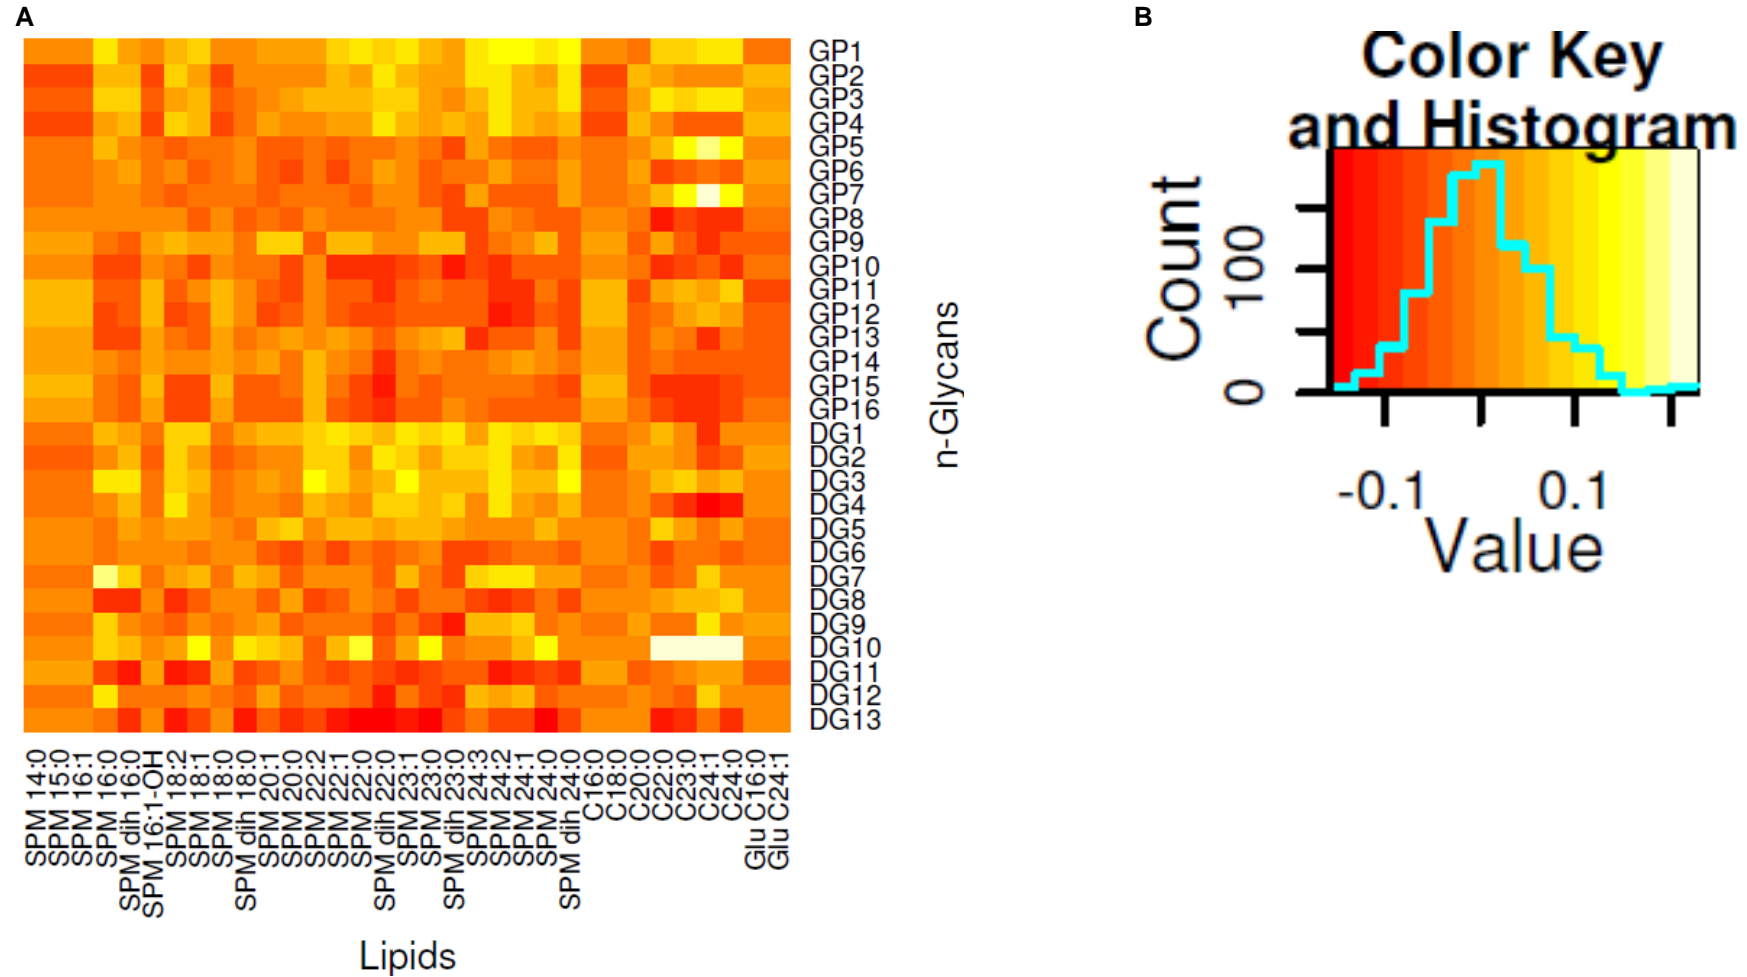

**Figure S7.** Associations between summary glycan scores and summary lipid scores in the ORCADES cohort (Scotland). A) Heatmap of Pearson correlation coefficients. B) Colorkey and histogram of the Pearson correlation coefficients  $r$ .

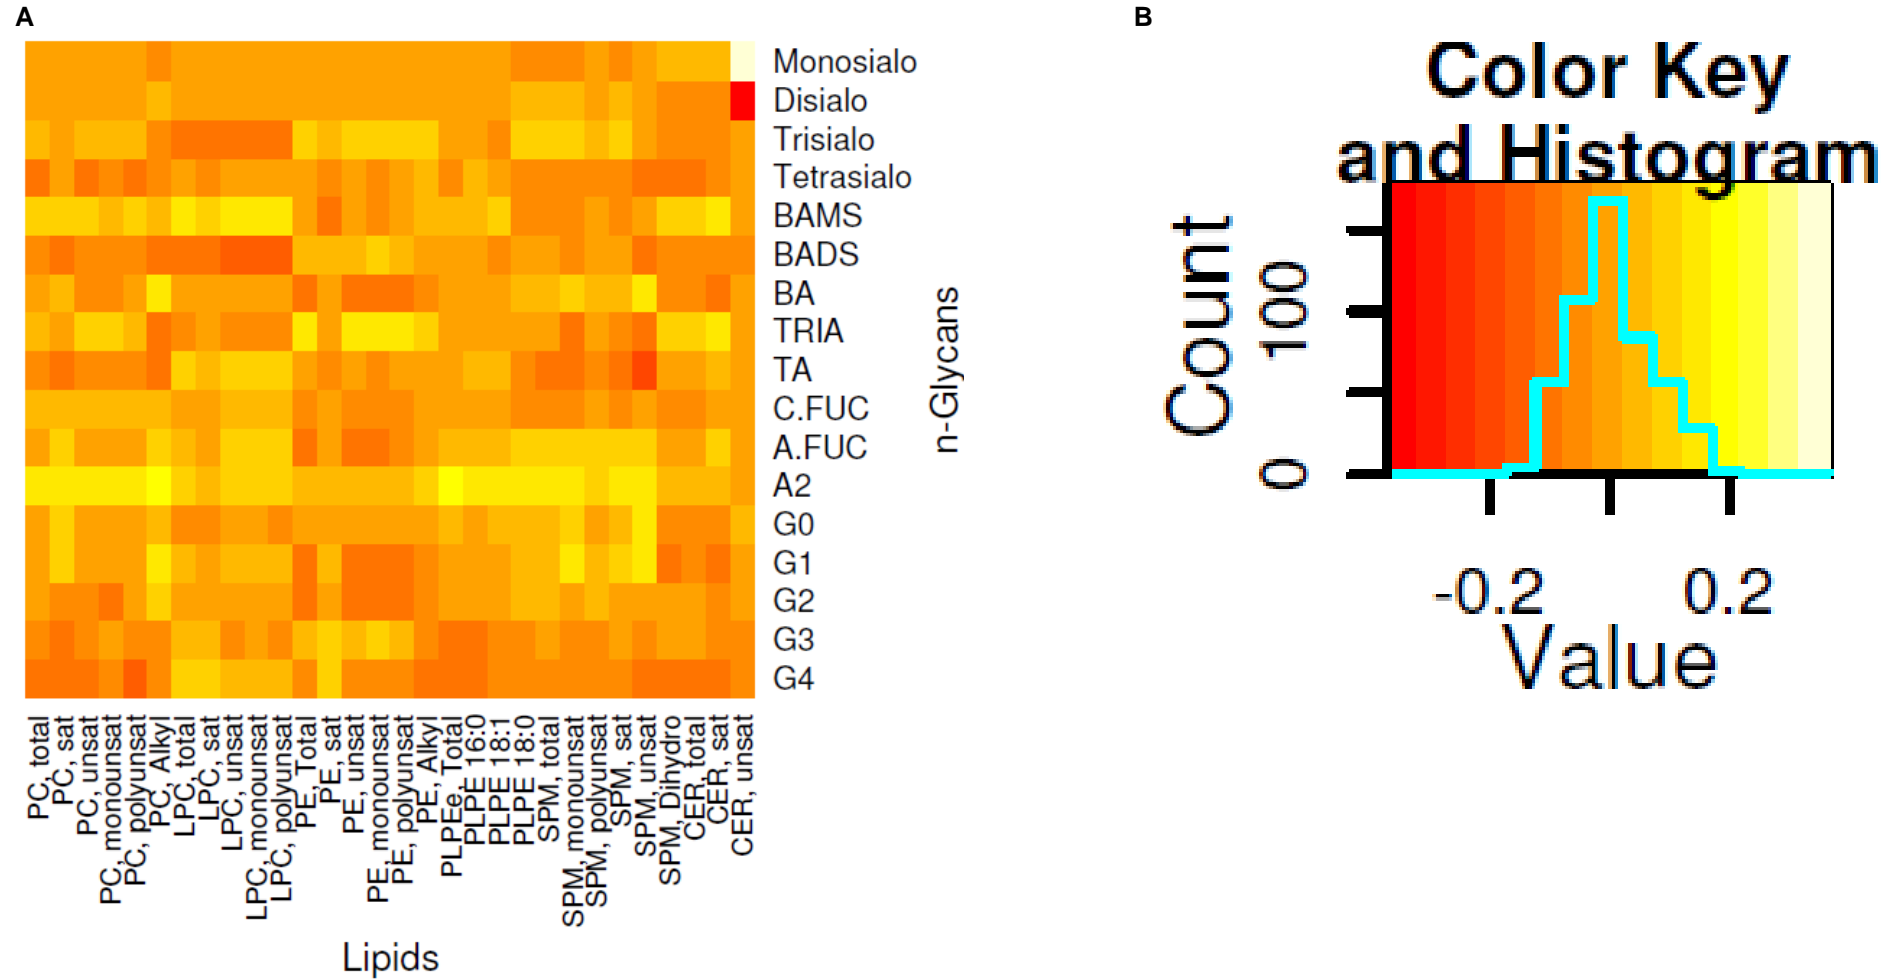



**Figure S8.** Associations between glycan species and glycerophospholipids in the NSPHS cohort (Sweden). A) Heatmap of Pearson correlation coefficients. B) Colorkey and histogram of the Pearson correlation coefficients  $r$ .

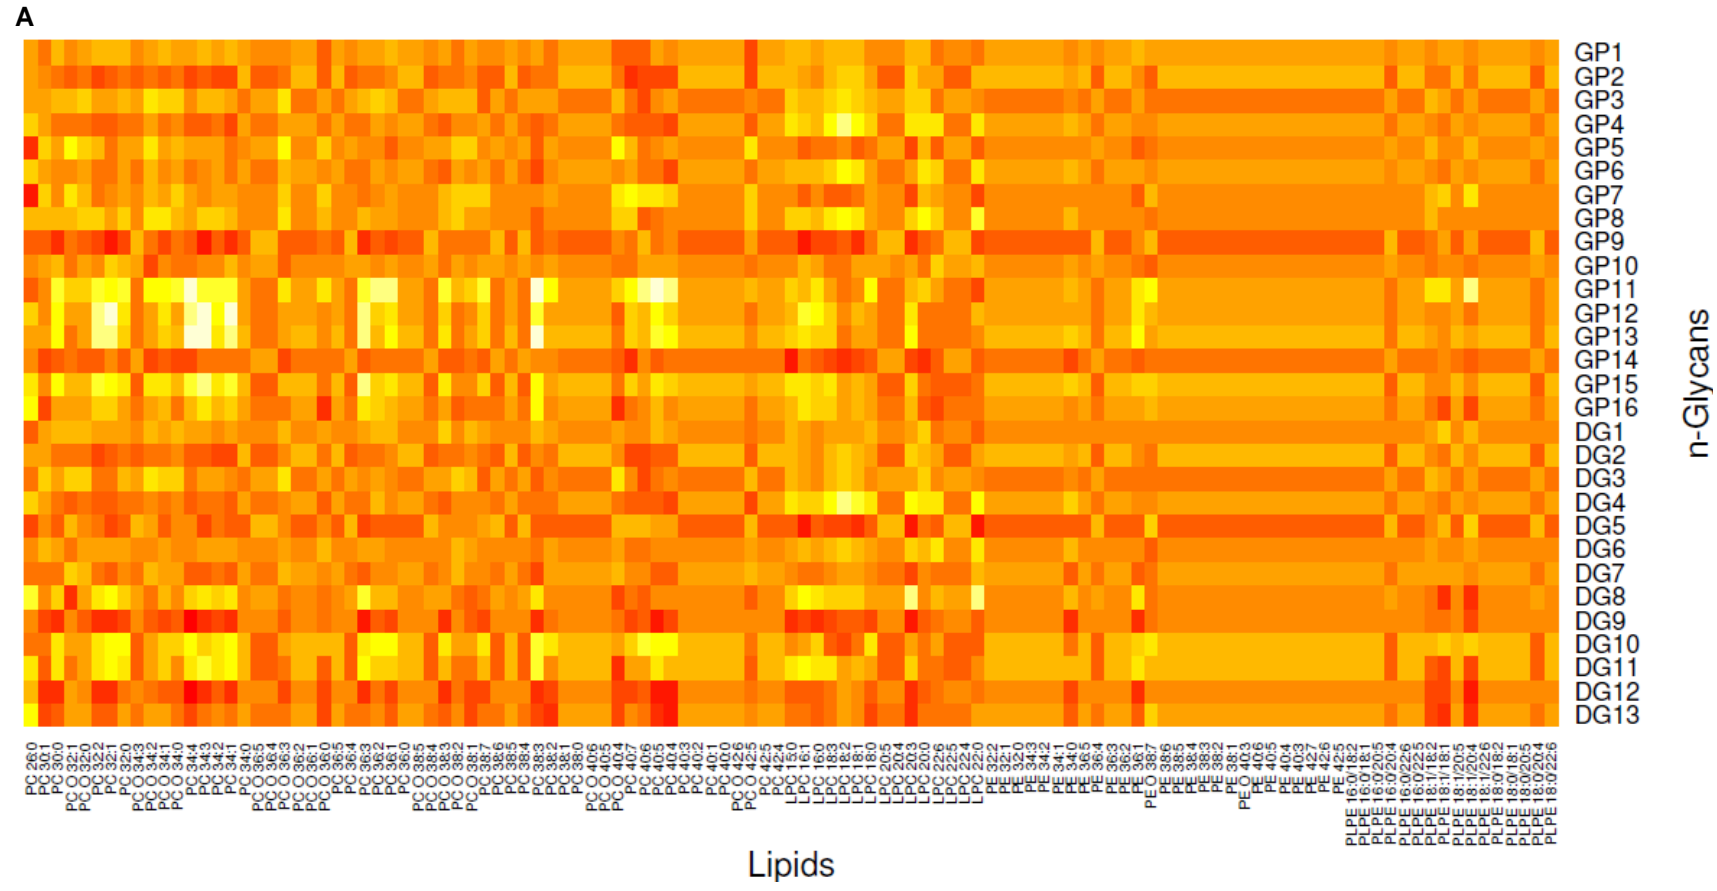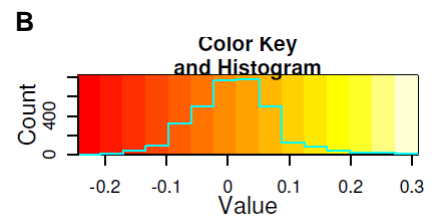

**Figure S9.** Associations between glycan species and sphingolipids species in the NSPHS cohort (Sweden). A) Heatmap of Pearson correlation coefficients. B) Colorkey and histogram of the Pearson correlation coefficients  $r$ .

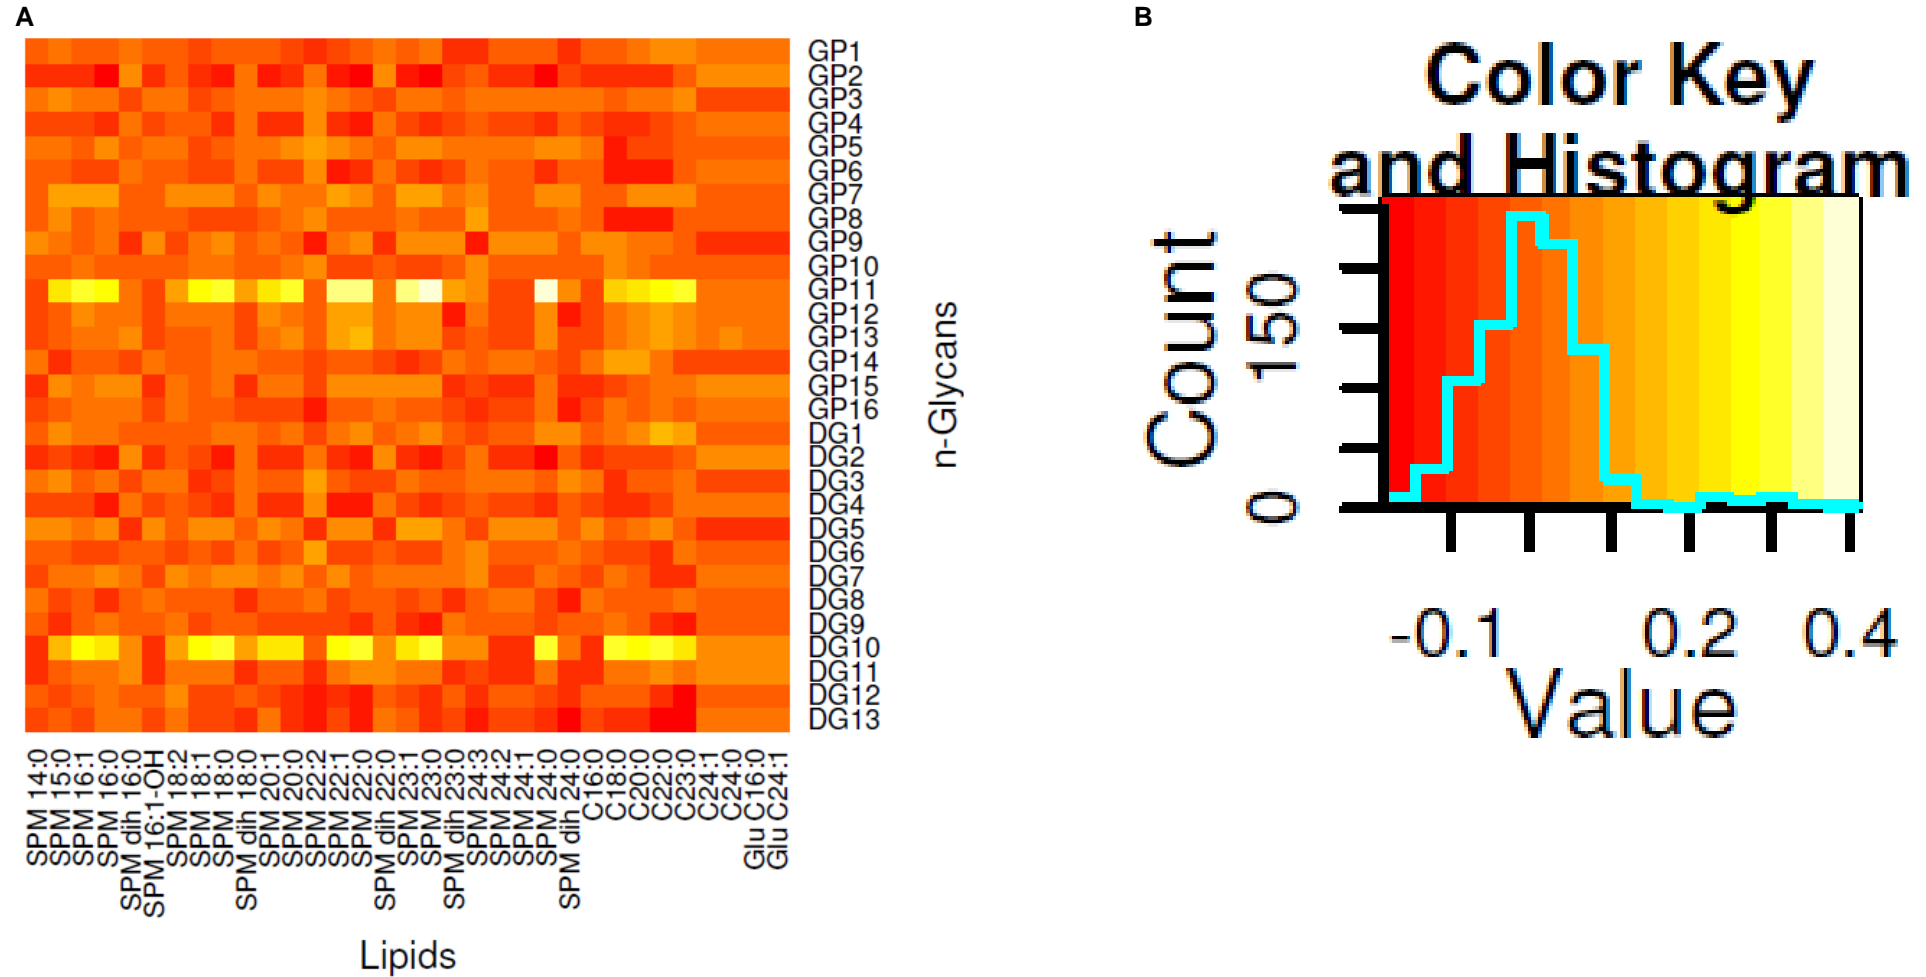

**Figure S10.** Associations between glycan summary scores and lipid summary scores in the NSPHS cohort (Sweden). A) Heatmap of Pearson correlation coefficients. B) Colorkey and histogram of the Pearson correlation coefficients  $r$ . See Tables S1 and S2 for glycan and lipid abbreviations.

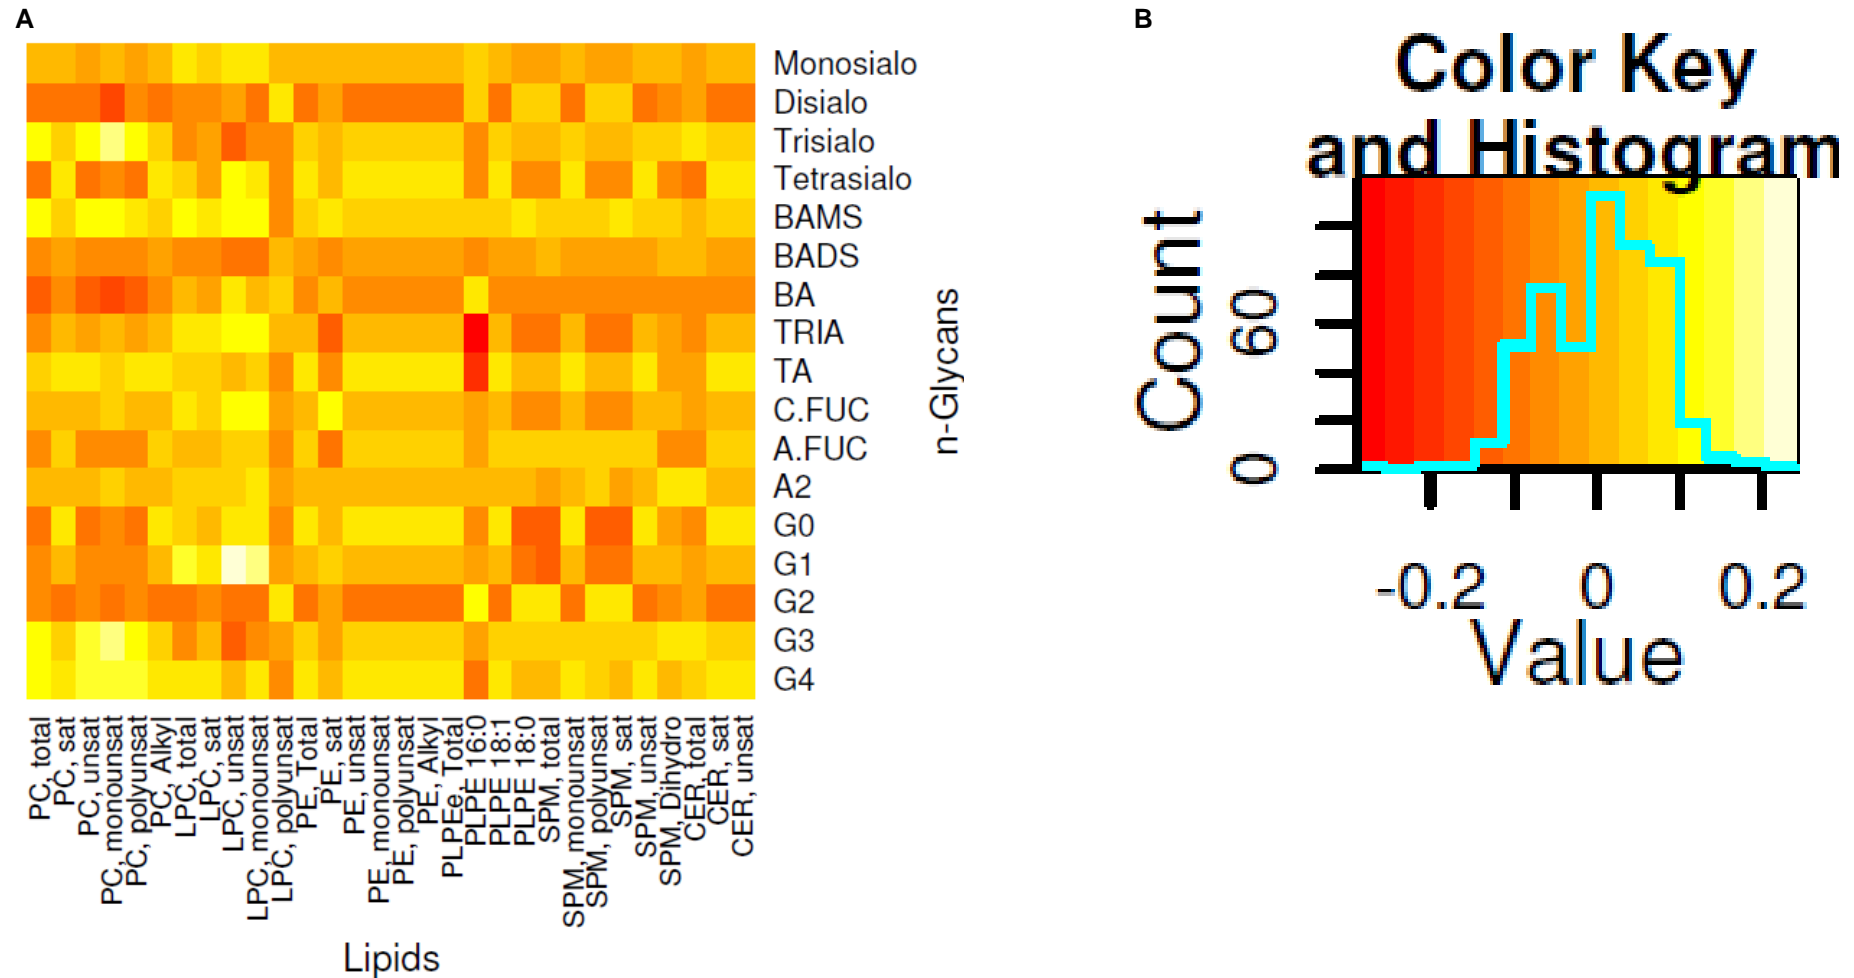

**Table S1.** Glycan structures present in different HPLC peaks.

| Peak | Structure                                                                                                                                                                | Peak | Structure                                                                                                                | Peak                                                                                           | Structure                                                                                                  | Peak | Structure                                                                                                                                                      |
|------|--------------------------------------------------------------------------------------------------------------------------------------------------------------------------|------|--------------------------------------------------------------------------------------------------------------------------|------------------------------------------------------------------------------------------------|------------------------------------------------------------------------------------------------------------|------|----------------------------------------------------------------------------------------------------------------------------------------------------------------|
| GP1  | A2                                                                                                                                                                       | GP7  | FA2BG2                                                                                                                   | GP12                                                                                           | A2F1G2S2                                                                                                   | DG1  | A2                                                                                                                                                             |
| GP2  | A2B<br>A1G1<br>FA2                                                                                                                                                       |      | M7D3<br>A2G2S(3)1<br>A2G2S(6)1<br>M7D1                                                                                   |                                                                                                | A3G3S(3,3)2<br>A3G3S(3,6)2<br>A3G3S(6,6)2<br>A3BG3S(3,3)2<br>A3BG3S(3,6)2<br>A3BG3S(6,6)2                  | DG2  | A2B<br>A1G1<br>FA2                                                                                                                                             |
| GP3  | M5<br>FA2B<br>A2[6]G1<br>A2[6]BG1                                                                                                                                        |      | GP8                                                                                                                      |                                                                                                | A2BG2S(3)1<br>A2BG2S(6)1<br>M5A1G1S1<br>FA2G2S(3)1<br>FA2G2S(6)1<br>A3G3<br>FA2BG2S(3)1<br>FA2BG2S(6)1     | GP13 | A3G3F1S2<br>FA3G3S(3,3)2<br>FA3G3S(3,6)2<br>FA3G3S(6,6)2<br>FA3BG3S(3,3)2<br>FA3BG3S(3,6)2<br>FA3BG3S(6,6)2<br>A3G3S(3,3,6)3<br>A3G3S(3,6,6)3<br>A3G3S(6,6,6)3 |
| GP4  | A2[3]G1<br>A2[3]BG1<br>M4A1G1<br>FA2[6]G1<br>FA2[6]BG1<br>A1[6]G1S(3)1<br>A1[6]G1S(6)1<br>FA2[3]G1<br>FA2[3]BG1<br>M6D1, D2<br>A1[3]G1S(3)1<br>A1[3]G1S(6)1              | GP9  |                                                                                                                          | A2F1G2S(3)1<br>A2F1G2S(6)1<br>M8D2, D3<br>A2G2S(3,3)2<br>A2G2S(3,6)2<br>A2G2S(6,6)2<br>M8D1,D3 | GP14                                                                                                       |      | A3F1G3S(3,3,6)3<br>FA3F1G3S(6,6,6)3<br>A4G4S(6,6)2<br>A3F1G3S(3,6,6)3<br>A3F1G3S(6,6,6)3<br>A4G4S(6,6,6)3<br>A4F1G4S2<br>A4G4S3                                |
|      |                                                                                                                                                                          |      | GP5                                                                                                                      | GP10                                                                                           |                                                                                                            | GP15 | GP16                                                                                                                                                           |
| DG6  | FA2G2<br>M5A1G1<br>FA2BG2                                                                                                                                                |      |                                                                                                                          |                                                                                                |                                                                                                            |      |                                                                                                                                                                |
| GP6  | M6D3<br>A2[6]G1S(3)1<br>A2[6]G1S(6)1<br>A2G2<br>A2[3]G1S(3)1<br>A2[3]G1S(6)1<br>A2BG2                                                                                    | GP11 | A2BG2S(3,3)2<br>A2BG2S(3,6)2<br>A2BG2S(6,6)2<br>A3BG3S(3)1<br>A3BG3S(6)1<br>FA2G2S(3,3)2<br>FA2G2S(3,6)2<br>FA2G2S(6,6)2 | GP15                                                                                           | A4G4S4<br>A4F1G4S3                                                                                         | DG7  | M7D3<br>A2F1G2<br>M7D1                                                                                                                                         |
|      |                                                                                                                                                                          |      |                                                                                                                          |                                                                                                |                                                                                                            | DG8  | A3G3<br>A2F2G2<br>FA3G3<br>M8D2, D3<br>M8D1,D3                                                                                                                 |
| GP6  | FA2[6]G1S(3)1<br>FA2[6]G1S(6)1<br>FA2[6]BG1S(3)1<br>FA2[6]BG1S(6)1<br>M4A1G1S1<br>FA2G2<br>FA2[3]G1S(3)1<br>FA2[3]G1S(6)1<br>A2BG1S1<br>FA2[3]BG1S(3)1<br>FA2[3]BG1S(6)1 | GP11 | FA2BG2S(3,3)2<br>FA2BG2S(3,6)2<br>FA2BG2S(6,6)2<br>M9                                                                    | GP16                                                                                           | A4G4S(6,6,6,6)4<br>A4G4S(3,6,6,6)4<br>A4BG4S4<br>FA4G4S4<br>A4F1G4S4<br>A4G4LacS4<br>A4F2G4S4<br>FA4F1G4S4 | DG9  | FA3BG3<br>A3F1G3                                                                                                                                               |
|      |                                                                                                                                                                          |      |                                                                                                                          |                                                                                                |                                                                                                            | DG10 | M9<br>FA3F1G3                                                                                                                                                  |
|      |                                                                                                                                                                          |      |                                                                                                                          |                                                                                                |                                                                                                            | DG11 | A4G4<br>A4BG4<br>A3F2G3<br>FA4G4                                                                                                                               |
|      |                                                                                                                                                                          |      |                                                                                                                          |                                                                                                |                                                                                                            | DG12 | A4F1G4                                                                                                                                                         |
|      |                                                                                                                                                                          |      |                                                                                                                          |                                                                                                |                                                                                                            | DG13 | A4G4Lac<br>A4F2G4<br>FA4F1G4                                                                                                                                   |

*Note:* Structure abbreviations: all N-glycans have two core GlcNAcs; F at the start of the abbreviation indicates a core fucose  $\alpha$ 1-6 linked to the inner GlcNAc; Mx, number (x) of mannose on core GlcNAcs; D1 indicates that the  $\alpha$ 1-2 mannose is on the Man $\alpha$ 1-6Man $\alpha$ 1-6 arm, D2 on the Man $\alpha$ 1-3Man $\alpha$ 1-6 arm, D3 on the Man $\alpha$ 1-3 arm of M6 and on the Man $\alpha$ 1-2Man $\alpha$ 1-3 arm of M7 and M8; Ax, number of antenna (GlcNAc) on trimannosyl core; A2, biantennary with both GlcNAcs as  $\beta$ 1-2 linked; A3, triantennary with a GlcNAc linked  $\beta$ 1-2 to both mannose and the third GlcNAc linked  $\beta$ 1-4 to the  $\alpha$ 1-3 linked mannose; A4, GlcNAcs linked as A3 with additional GlcNAc  $\beta$ 1-6 linked to  $\alpha$ 1-6 mannose; B, bisecting GlcNAc linked  $\beta$ 1-4 to  $\beta$ 1-3 mannose; Gx, number (x) of  $\beta$ 1-4 linked galactose on antenna; [3]G1 and [6]G1 indicates that the galactose is on the antenna of the  $\alpha$ 1-3 or  $\alpha$ 1-6 mannose; F(x), number (x) of fucose linked  $\alpha$ 1-3 to antenna GlcNAc; Lac(x), number (x) of lactosamine (Gal $\beta$ 1-4GlcNAc) extensions; Sx, number (x) of sialic acids linked to galactose; the numbers 3 or 6 or in parentheses after S indicate whether the sialic acid is in an  $\alpha$ 2-3 or  $\alpha$ 2-6 linkage. If there is no linkage number, the exact link is unknown.

**Table S2.** Overview over the examined N-glycan traits.

| Abbreviation | Name                                            | Category                                | Formula                                         |
|--------------|-------------------------------------------------|-----------------------------------------|-------------------------------------------------|
| GP1 .. GP6   | Glycan Peak 1 .. Glycan Peak 6                  | Core glycans                            | Calculated from HILIC profile                   |
| GP7 .. GP8   | Glycan Peak 7 .. Glycan Peak 8                  | Monosialylated biantennary core glycans | Calculated from HILIC profile                   |
| GP9 .. GP11  | Glycan Peak 9 .. Glycan Peak 11                 | Disialylated biantennary core glycans   | Calculated from HILIC profile                   |
| GP12 .. GP14 | Glycan Peak 12 .. Glycan Peak 14                | Trigalactosylated core glycans          | Calculated from HILIC profile                   |
| GP15 .. GP16 | Glycan Peak 15 .. Glycan Peak 16                | Tetragalactosylated core glycans        | Calculated from HILIC profile                   |
| DG1 .. DG7   | Disialylated Glycan 1 .. Disialylated Glycan 7  | Biantennary core core glycans           | Calculated from HILIC after sialidase treatment |
| DG8 .. DG10  | Disialylated Glycan 8 .. Disialylated Glycan 10 | Triantennary core glycans               | Calculated from HILIC after sialidase treatment |
| DG11 .. DG13 | Disialylated Glycan 1 .. Disialylated Glycan 13 | Tetraantennary core glycans             | Calculated from HILIC after sialidase treatment |
| Monosialo    | Monosialylated Glycans                          | Summary Score                           | Calculated from WAX profile                     |
| Disialo      | Disialylated Glycans                            | Summary Score                           | Calculated from WAX profile                     |
| Trisialo     | Trisialylated Glycans                           | Summary Score                           | Calculated from WAX profile                     |
| Tetrasialo   | Tetrasialylated Glycans                         | Summary Score                           | Calculated from WAX profile                     |
| C-FUC        | Core fucosylated glycans                        | Summary Score                           | = DG6/(DG5+DG6)*100                             |
| A-FUC        | Antennary fucosylated glycans                   | Summary Score                           | = DG7/(DG5+DG7)*100                             |
| A2           | Biantennary nongalactosylated glycan            | Summary Score                           | = (GP1+DG1)/2                                   |
| BA           | Biantennary glycans                             | Summary Score                           | = DG1 + DG2 + DG3 + DG4 + DG5 + DG6 + DG7       |
| BAMS         | Monosialylated biantennary glycans              | Summary Score                           | = (GP7 + GP8) / (DG5 + DG6 + DG7) * 100         |
| BADS         | Disialylated biantennary glycans                | Summary Score                           | = (GP9 + GP10 + GP11) / (DG5 + DG6 + DG7)*100   |
| TRIA         | Triantennary glycans                            | Summary Score                           | = DG8 + DG9 + DG10                              |
| TA           | Tetraantennary glycans                          | Summary Score                           | = DG11 + DG12 + DG13                            |
| G0           | Nongalactosylated glycans                       | Summary Score                           | = DG1 + DG2                                     |
| G1           | Monogalactosylated glycans                      | Summary Score                           | = DG3 + DG4                                     |
| G2           | Digalactosylated glycans                        | Summary Score                           | = DG5 + DG6 + DG7                               |
| G3           | Trigalactosylated glycans                       | Summary Score                           | = GP12 + GP13 + GP14                            |
| G4           | Tetragalactosylated glycans                     | Summary Score                           | = GP15 + GP16                                   |

**Table S3.** Overview over of examined lipid traits.

| Abbreviation | Common Name                                | Lipid Maps                |                                   |                                                       | ID             |
|--------------|--------------------------------------------|---------------------------|-----------------------------------|-------------------------------------------------------|----------------|
|              |                                            | Category                  | Class                             | Subclass                                              |                |
| TC           | Total Cholesterol                          | [ST] Sterol Lipids        | [ST01] Sterols                    | [ST0101] Cholesterol and derivatives                  | [LMST01010001] |
| LDL-C        | Low-Density Lipoprotein Cholesterol        | [ST] Sterol Lipids        | [ST01] Sterols                    | [ST0101] Cholesterol and derivatives                  | [LMST01010001] |
| HDL-C        | High-Density Lipoprotein Cholesterol       | [ST] Sterol Lipids        | [ST01] Sterols                    | [ST0101] Cholesterol and derivatives                  | [LMST01010001] |
| TG           | Triglycerides                              | [GL] Glycerolipids        | [GL03] Triacylglycerols           | [GL0301] Triacylglycerols                             |                |
| GP           | Glycerophospholipid                        | [GP] Glycerophospholipids |                                   |                                                       |                |
| PC           | Phosphatidylcholine                        | [GP] Glycerophospholipids | [GP01] Glycerophosphocholines     |                                                       |                |
| LPC          | Lysophosphatidylcholine                    | [GP] Glycerophospholipids | [GP01] Glycerophosphocholines     | [GP0105] Monoacylglycerophosphocholines               |                |
| PE           | Phosphatidylethanolamine                   | [GP] Glycerophospholipids | [GP02] Glycerophosphoethanolamine |                                                       |                |
| PEPL         | Phosphatidylethanolamine-based plasmalogen | [GP] Glycerophospholipids | [GP02] Glycerophosphoethanolamine | [GP0203] 1Z-alkenyl,2-acylglycero-phosphoethanolamine |                |
| SP           | Sphingolipid                               | [SP] Sphingolipids        |                                   |                                                       |                |
| SM           | Sphingomyelin                              | [SP] Sphingolipids        | [SP03] Phosphosphingolipids       | [SP0301] Ceramide phosphocholines                     |                |
| CER          | Ceramide                                   | [SP] Sphingolipids        | [SP02] Ceramides                  |                                                       |                |
| GlcCER       | Glucosylceramide/<br>Glucocerebroside      | [SP] Sphingolipids        | [SP05] Neutral glycosphingolipids | [SP0501] Simple GLC series                            |                |

Abbreviations which differ from the LipidMaps classification were used in the text to improve readability. Abbreviations are in order of presentation.
